# Supplementary material for: Expression of Iron-Related Proteins Differentiate Non-Cancerous and Cancerous Breast Tumors
Source: Int J Mol Sci. 2017 Feb 14;18(2):410. doi: 10.3390/ijms18020410 (PMC5343944; doi:10.3390/ijms18020410)
Supplement: Supplementary file 1 [file ijms-18-00410-s001.pdf]

# Supplementary Materials: Expression of Iron-Related Proteins Differentiates Non-Cancerous and Cancerous Breast Tumors

Sara Pizzamiglio, Maida De Bortoli, Elena Taverna, Michele Signore, Silvia Veneroni, William Chi-shing Cho, Rosaria Orlandi, Paolo Verderio and Italia Bongarzone

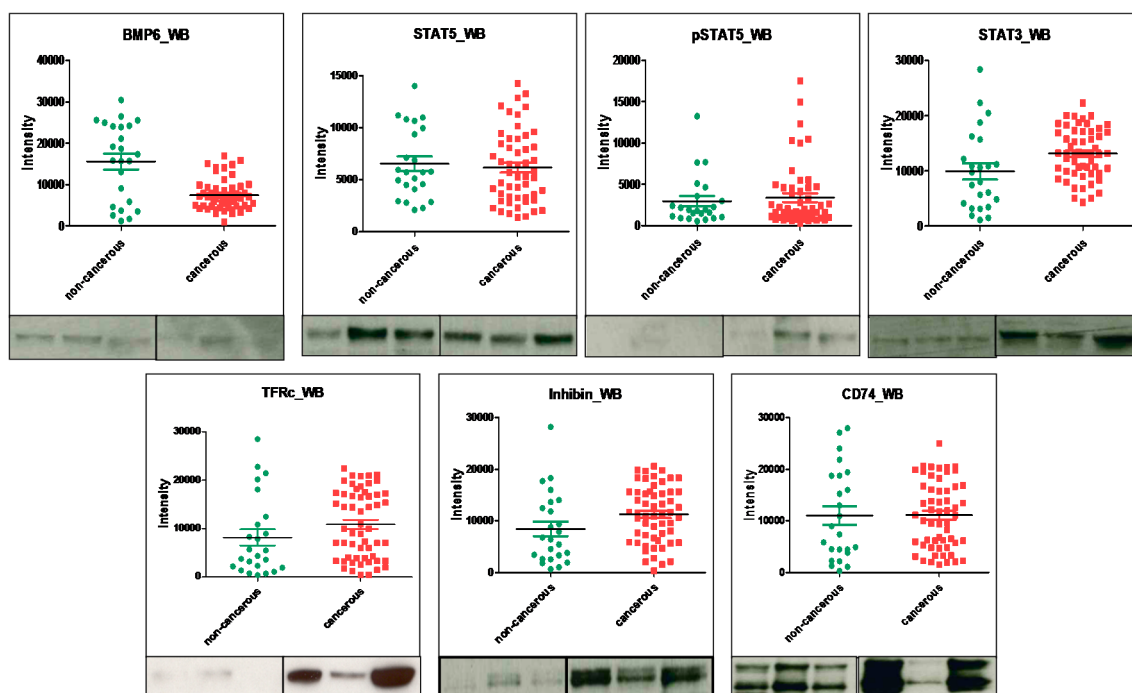

**Figure S1.** Plots of the individual data intensities obtained in Western blot experiments; Western blotting results probing non-cancerous and cancerous tissue lysates with antibodies for BMP6, STAT5, STAT5\_pY694, STAT3, CD74, TFRc, Inhibin, and CD74; Immunoreactive bands were visualized using horseradish peroxidase–linked anti-mouse, anti-rabbit, or anti-goat antiserum and detected using an enhanced chemiluminescence system (Bio-Rad Laboratories, Milan, Italy); Protein quantification was performed using Image J 1.38Xsoftware (<http://rsbweb.nih.gov/ij/index.html>). Each point represents signal intensity; Black horizontal bars indicate the mean of signal intensities; Plots were obtained using GraphPad Prism 4.0 (GraphPad Software, Inc., San Diego, CA, USA).

**Table S1.** Clinical-pathological characteristics of the 56 malignant breast tumors.

| Sample | Age           | ER            | PgR           | Histology                  | HER2_<br>Image J | Arbitrary<br>Evaluation |
|--------|---------------|---------------|---------------|----------------------------|------------------|-------------------------|
| 1      | 54            | positive      | positive      | invasive ductal carcinoma  | 1066             | negative                |
| 2      | 64            | positive      | positive      | invasive ductal carcinoma  | 604              | negative                |
| 3      | 42            | negative      | negative      | invasive ductal carcinoma  | 455              | negative                |
| 4      | 44            | positive      | positive      | mixed                      | 758              | negative                |
| 5      | 51            | positive      | positive      | invasive ductal carcinoma  | 516              | negative                |
| 6      | not available | not available | not available | not available              | 890              | negative                |
| 7      | 35            | negative      | negative      | invasive ductal carcinoma  | 597              | negative                |
| 8      | 59            | positive      | positive      | invasive ductal carcinoma  | 850              | negative                |
| 9      | 68            | positive      | positive      | mixed                      | 1143             | negative                |
| 10     | 64            | positive      | positive      | invasive ductal carcinoma  | 2323             | possibly positive       |
| 11     | 51            | negative      | negative      | mixed                      | 11436            | unequivocally positive  |
| 12     | 45            | positive      | negative      | invasive lobular carcinoma | 1270             | negative                |
| 13     | 68            | not available | not available | invasive ductal carcinoma  | 1610             | negative                |
| 14     | 59            | not available | not available | mixed                      | 1817             | negative                |
| 15     | 74            | positive      | positive      | invasive ductal carcinoma  | 452              | negative                |
| 16     | 81            | negative      | negative      | neuroendocrine             | 740              | negative                |
| 17     | 47            | positive      | positive      | invasive ductal carcinoma  | 1068             | negative                |

Table S1. Cont.

| Sample | Age           | ER            | PgR           | Histology                  | HER2_<br>Image J | Arbitrary<br>Evaluation |
|--------|---------------|---------------|---------------|----------------------------|------------------|-------------------------|
| 18     | 51            | positive      | positive      | invasive ductal carcinoma  | 624              | negative                |
| 19     | 51            | positive      | negative      | invasive ductal carcinoma  | 932              | negative                |
| 20     | not available | not available | not available | mixed                      | 1173             | negative                |
| 21     | 63            | positive      | negative      | invasive ductal carcinoma  | 862              | negative                |
| 22     | 69            | positive      | negative      | invasive lobular carcinoma | 3898             | possibly positive       |
| 23     | 44            | positive      | negative      | invasive lobular carcinoma | 1183             | negative                |
| 24     | 82            | not available | not available | invasive lobular carcinoma | 1926             | negative                |
| 25     | 34            | positive      | positive      | invasive ductal carcinoma  | 669              | negative                |
| 26     | 67            | positive      | positive      | invasive lobular carcinoma | 657              | negative                |
| 27     | not available | not available | not available | not available              | 1111             | negative                |
| 28     | 61            | positive      | positive      | invasive ductal carcinoma  | 1042             | negative                |
| 29     | 52            | negative      | negative      | invasive ductal carcinoma  | 1145             | negative                |
| 30     | 55            | negative      | negative      | invasive ductal carcinoma  | 13684            | unequivocally positive  |
| 31     | 62            | positive      | negative      | invasive lobular carcinoma | 627              | negative                |
| 32     | 67            | positive      | positive      | invasive ductal carcinoma  | 981              | negative                |
| 33     | 43            | negative      | negative      | invasive ductal carcinoma  | 675              | negative                |
| 34     | 49            | negative      | negative      | invasive ductal carcinoma  | 803              | negative                |
| 35     | 67            | positive      | positive      | invasive ductal carcinoma  | 2640             | possibly positive       |
| 36     | not available | positive      | negative      | not available              | 434              | negative                |
| 37     | 58            | positive      | positive      | invasive ductal carcinoma  | 1636             | negative                |
| 38     | 50            | positive      | positive      | invasive ductal carcinoma  | 2042             | possibly positive       |
| 39     | 74            | positive      | positive      | invasive ductal carcinoma  | 11977            | unequivocally positive  |
| 40     | 49            | negative      | negative      | invasive ductal carcinoma  | 1295             | negative                |
| 41     | 59            | positive      | positive      | invasive ductal carcinoma  | 1178             | negative                |
| 42     | 50            | negative      | negative      | invasive lobular carcinoma | 9827             | unequivocally positive  |
| 43     | 66            | not available | not available | invasive ductal carcinoma  | 2470             | possibly positive       |
| 44     | 57            | negative      | negative      | invasive ductal carcinoma  | 8334             | unequivocally positive  |
| 45     | 29            | negative      | negative      | invasive ductal carcinoma  | 7464             | possibly positive       |
| 46     | 74            | negative      | negative      | invasive ductal carcinoma  | 1159             | negative                |
| 47     | 46            | positive      | positive      | invasive ductal carcinoma  | 1356             | negative                |
| 48     | 51            | positive      | positive      | invasive ductal carcinoma  | 6317             | possibly positive       |
| 49     | 40            | negative      | negative      | invasive ductal carcinoma  | 1485             | negative                |
| 50     | 64            | positive      | positive      | invasive ductal carcinoma  | 1484             | negative                |
| 51     | 66            | negative      | negative      | invasive ductal carcinoma  | 14510            | unequivocally positive  |
| 52     | 66            | positive      | positive      | invasive ductal carcinoma  | 2239             | possibly positive       |
| 53     | not available | positive      | positive      | invasive lobular carcinoma | 1522             | negative                |
| 54     | 47            | negative      | negative      | invasive ductal carcinoma  | 2104             | possibly positive       |
| 55     | not available | not available | not available | not available              | 621              | negative                |
| 56     | 70            | not available | not available | invasive lobular carcinoma | 346              | negative                |

Except for 4 cancerous samples for which samples were immersed in a protein extraction solution at the moment of receipt and tissue sections were not available, all histology was examined by experienced pathologists at Fondazione IRCCS Istituto Nazionale dei Tumori of Milan; Cases were consecutively collected in the period 1990–1993 at Fondazione IRCCS Istituto Nazionale Tumori of Milan and the Table reports the available clinical-pathological characteristics of the 56 patients with malignant tumor. \* Note that HER2 scoring criteria were based on Western blot signal intensity obtained by densitometric analysis with image J software 1.38X (<http://rsbweb.nih.gov/ij/index.html>); This results may have value for research purposes only; ER: estrogen receptor; PgR: progesterone receptor; HER2: human epidermal growth factor receptor 2.

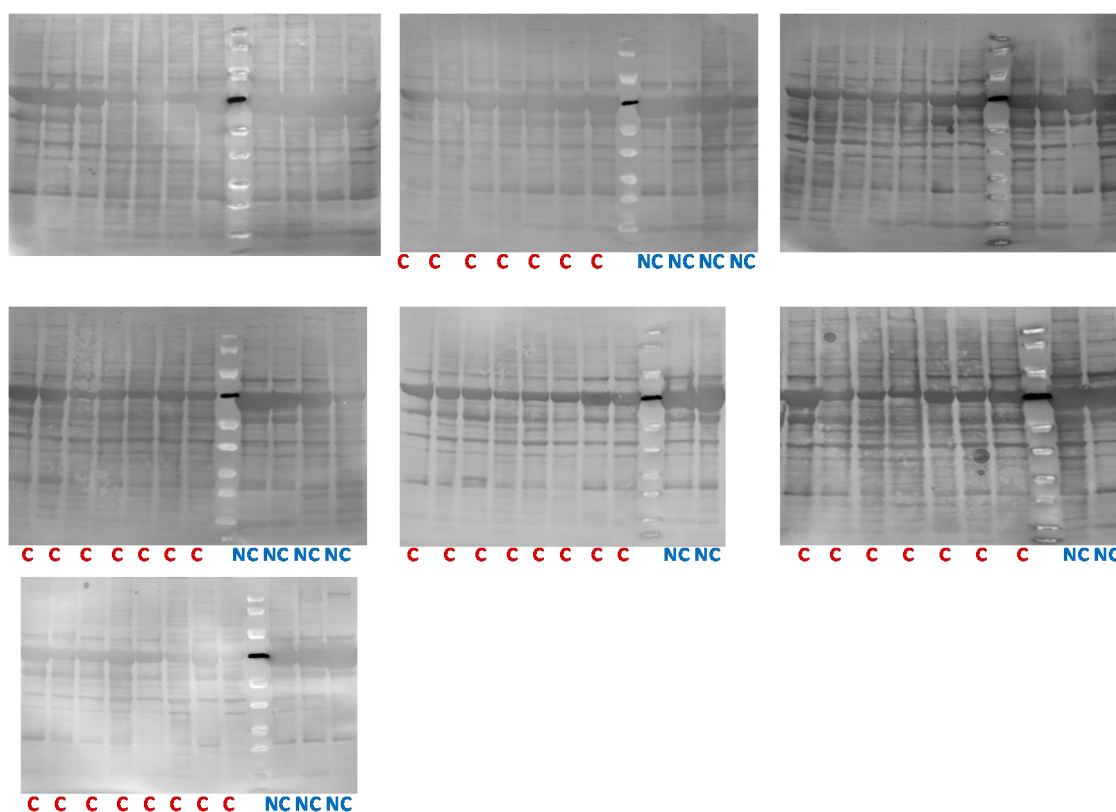

**Figure S2.** SYPRO Ruby staining of Western blots; Quality control of proteins derived from tissue samples; SYPRO Ruby protein blot stain (Molecular Probes) were used for protein quality assessment; Profile heterogeneity of C and NC samples was interpreted as variation caused by heterogeneity of samples in most respects, including its cellularity, genetic, histotype and biology; C: cancerous sample; NC: non-cancerous sample.

## SUPPLEMENTARY EXPERIMENTAL PROCEDURES

### Western blot staining with SYPRO Ruby

All electrophoresis (SDS-PAGE) and electroblotting experiments were performed with precast polyacrylamide NuPAGE NOVEX gels (Invitrogen, Milan, Italy) and with Hybond-C super nitrocellulose membrane (Amersham Biosciences, Little Chalfont, UK).

Proteins were transferred to nitrocellulose membranes, then stained with SYPRO Ruby according to the manufacturer's instructions.

For Western blot analysis antibodies for CD74 was from Sigma-Aldrich Ltd (The Old Brickyard New Road Gillingham Dorset SP8 4XT); antibodies for TFRC and BMP6 were from Abcam 330 (Cambridge, UK); antibodies for STAT5 were from Cell Signaling (Danvers, MA, United States); antibody for STAT3 was from Millipore (Temecula, CA, USA); antibody for INHA was from Thermo Fisher (Thermo Fisher Scientific, Waltham, MA, USA); and antibody for HER2 antibody (Ab3) was purchased from CalBiochem/Oncogene Research Products (Cambridge, MA, USA).
